# Supplementary material for: The FOXP1, FOXP2 and FOXP4 transcription factors are required for islet alpha cell proliferation and function in mice
Source: Springer Nature journal article supplement (doi:10.1007/s00125-015-3635-3), 2015-05-28
Supplement: MOESM1 [file 125_2015_3635_MOESM1_ESM.pdf]

|                | Control                                                                           | <i>Foxp1/2</i> cKO                                                                | <i>Foxp1/4</i> cKO                                                                | <i>Foxp2/4</i> cKO                                                                 | <i>Foxp1/2/4</i> cKO                                                                |
|----------------|-----------------------------------------------------------------------------------|-----------------------------------------------------------------------------------|-----------------------------------------------------------------------------------|------------------------------------------------------------------------------------|-------------------------------------------------------------------------------------|
|                | 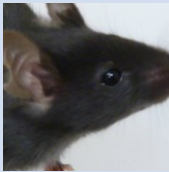 | 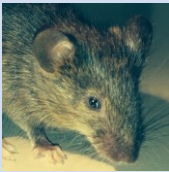 | 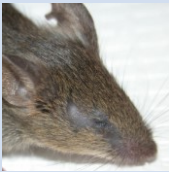 | 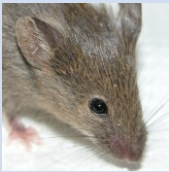 | 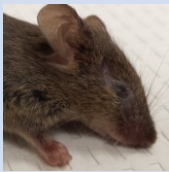 |
| Eye appearance | Normal                                                                            | Slightly recessed                                                                 | Recessed                                                                          | Normal                                                                             | Recessed                                                                            |

**ESM Table 1: Combinations of *Foxp1*, 2 and/or 4 cKO mutants have a variable recessed eye phenotype.** Photographs of the various conditional *Foxp* knockout mice demonstrates improper eye placement.
