# Supplementary material for: The FOXP1, FOXP2 and FOXP4 transcription factors are required for islet alpha cell proliferation and function in mice
Source: Springer Nature journal article supplement (doi:10.1007/s00125-015-3635-3), 2015-05-28
Supplement: MOESM2 [file 125_2015_3635_MOESM2_ESM.pdf]

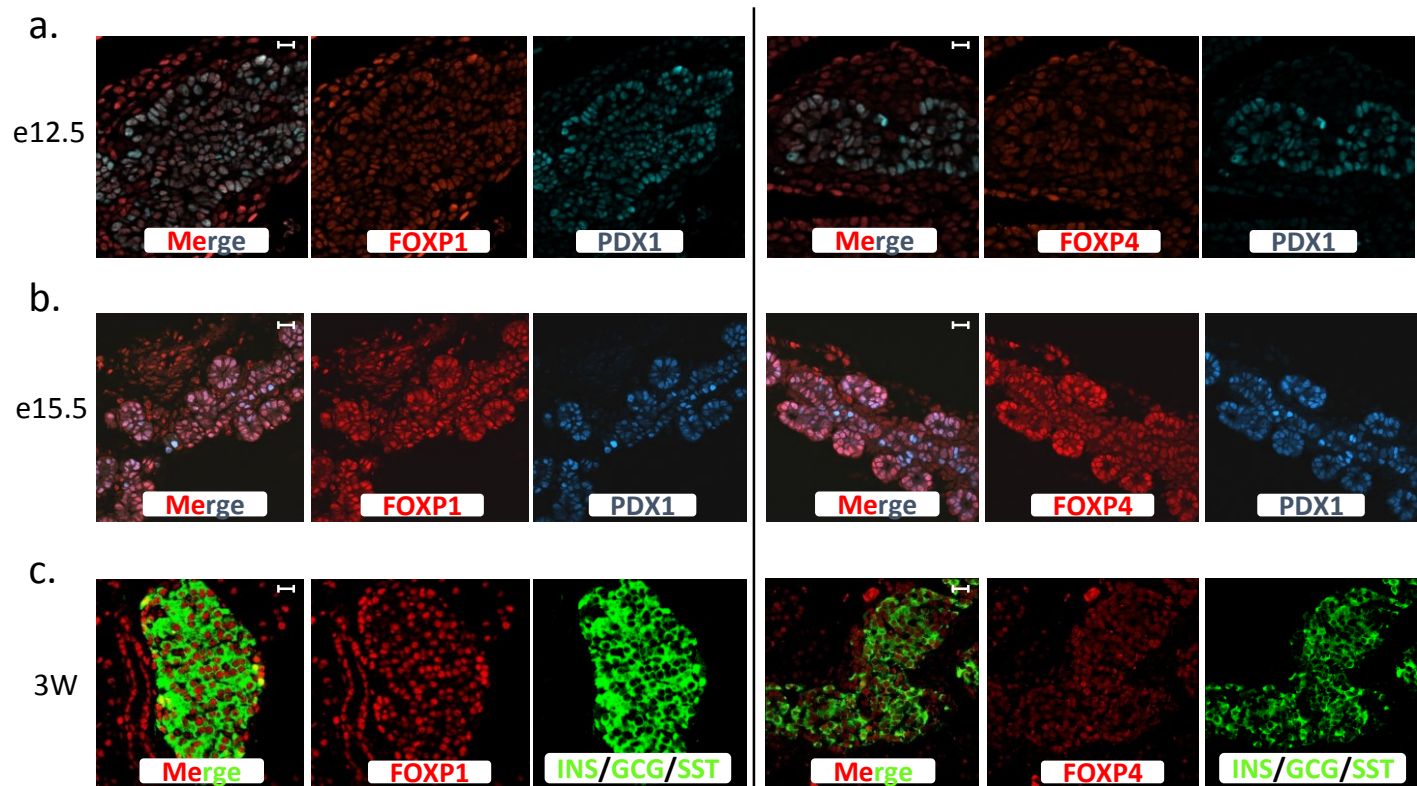

**ESM Fig. 1: FOXP1 and FOXP4 are broadly produced in the developing and adult pancreas.** Sections of WT e12.5 (a.), e15.5 (b.) and 3W (c.) postnatal pancreata were subjected to immunofluorescence analysis for FOXP1 or FOXP4. PDX1 was used in a-b to indicate pancreatic regions. Insulin (INS), Glucagon (GCG) and Somatostatin (SST) were used in 3W samples to mark islet endocrine cells. Scale bars = 20 $\mu$ m.
