# Supplementary material for: The FOXP1, FOXP2 and FOXP4 transcription factors are required for islet alpha cell proliferation and function in mice
Source: Springer Nature journal article supplement (doi:10.1007/s00125-015-3635-3), 2015-05-28
Supplement: MOESM3 [file 125_2015_3635_MOESM3_ESM.pdf]

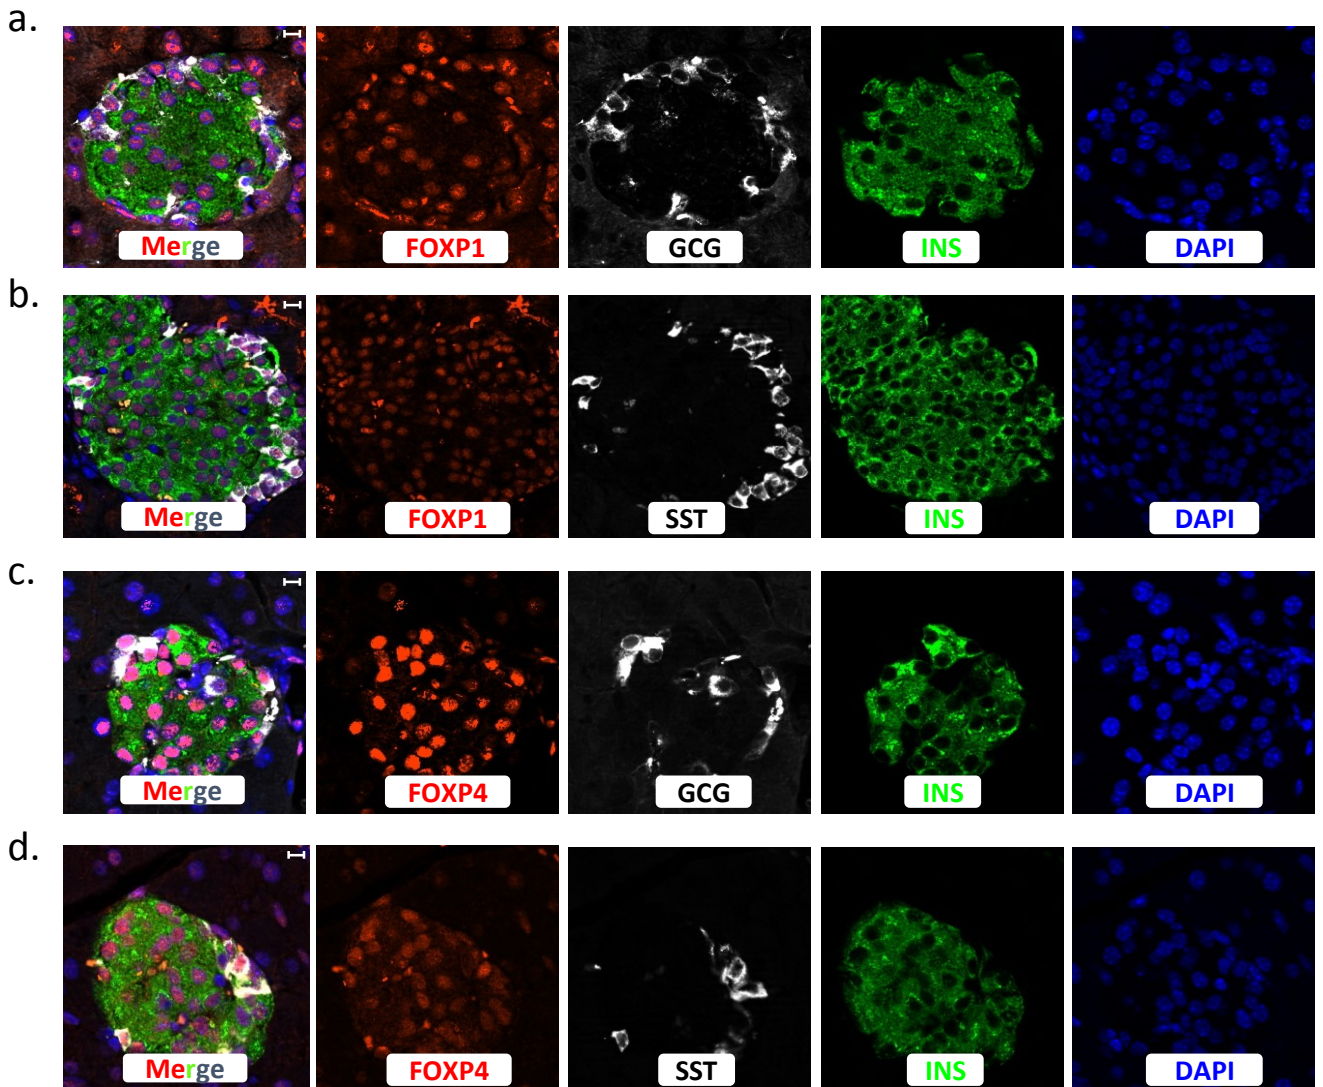

**ESM Fig. 2: FOXP1 and FOXP4 are present in alpha, beta, and delta endocrine cell types at 4 weeks.** 4W pancreatic sections were subjected to immunofluorescence analysis for FOXP1 (a-b) or FOXP4 (c-d), and endocrine hormones: . Insulin (INS), Glucagon (GCG) and Somatostatin (SST). Scale bars = 20 $\mu$ m.
