# Supplementary material for: The FOXP1, FOXP2 and FOXP4 transcription factors are required for islet alpha cell proliferation and function in mice
Source: Springer Nature journal article supplement (doi:10.1007/s00125-015-3635-3), 2015-05-28
Supplement: MOESM6 [file 125_2015_3635_MOESM6_ESM.pdf]

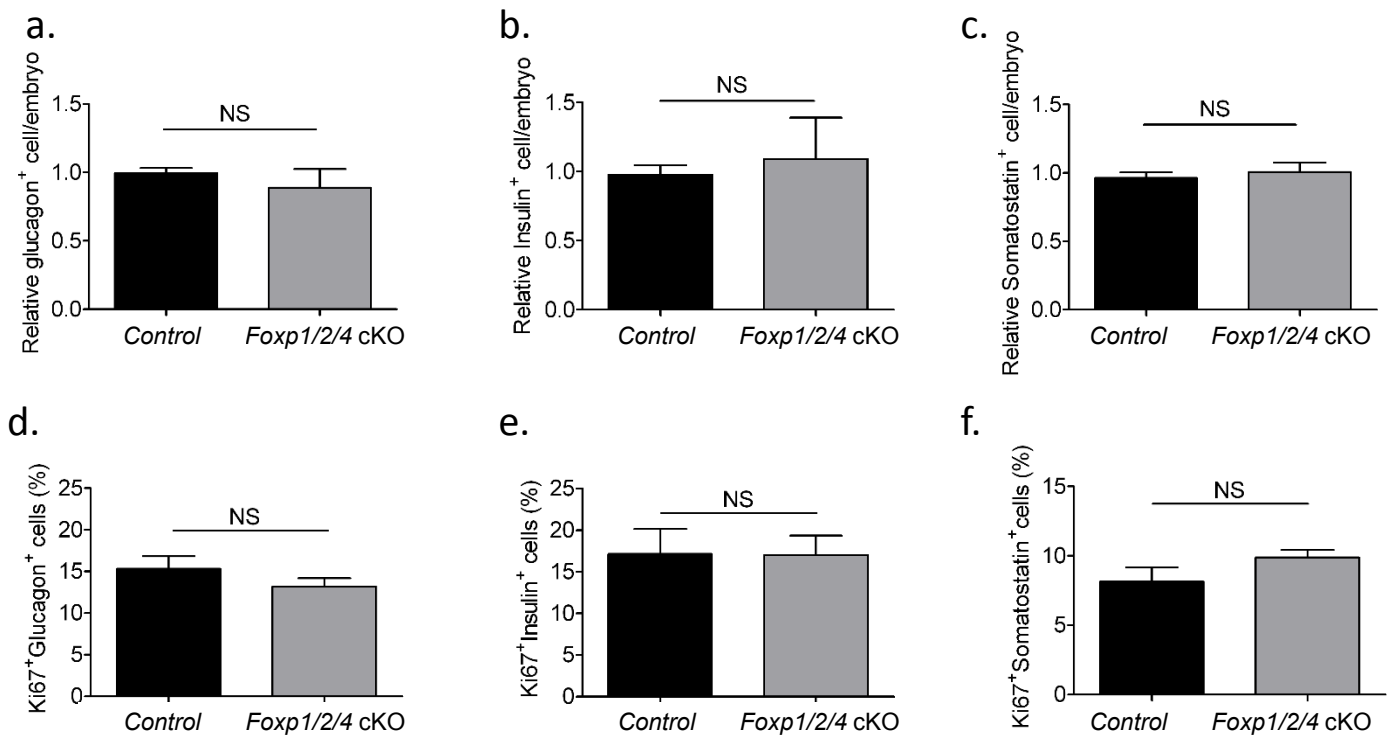

**ESM Fig. 5: e18.5 *Foxp1/2/4* cKO alpha, beta and delta cells do not have impaired proliferation.** a-c. Glucagon, Insulin and Somatostatin positive cells in e18.5 *Foxp1/2/4* cKO pancreata were counted and plotted as relative hormone<sup>+</sup> cell/ embryo as compared to control e18.5 embryos. The number of *Foxp1/2/4* cKO alpha (a.) beta (b.) and delta cells (c.) per e18.5 embryo was unchanged relative to Control embryos. d-f. e18.5 *Foxp1/2/4* cKO and control pancreata were stained for Ki67 and Glucagon, Insulin or Somatostatin. The percentage of proliferating alpha (d.) beta (e.) and delta cells (f.) was plotted by counting Ki67<sup>+</sup>hormone<sup>+</sup> vs hormone<sup>+</sup> cells from control and *Foxp1/2/4* cKO ( $n=3$  animals for each genotype).
