# Supplementary material for: The FOXP1, FOXP2 and FOXP4 transcription factors are required for islet alpha cell proliferation and function in mice
Source: Springer Nature journal article supplement (doi:10.1007/s00125-015-3635-3), 2015-05-28
Supplement: MOESM7 [file 125_2015_3635_MOESM7_ESM.pdf]

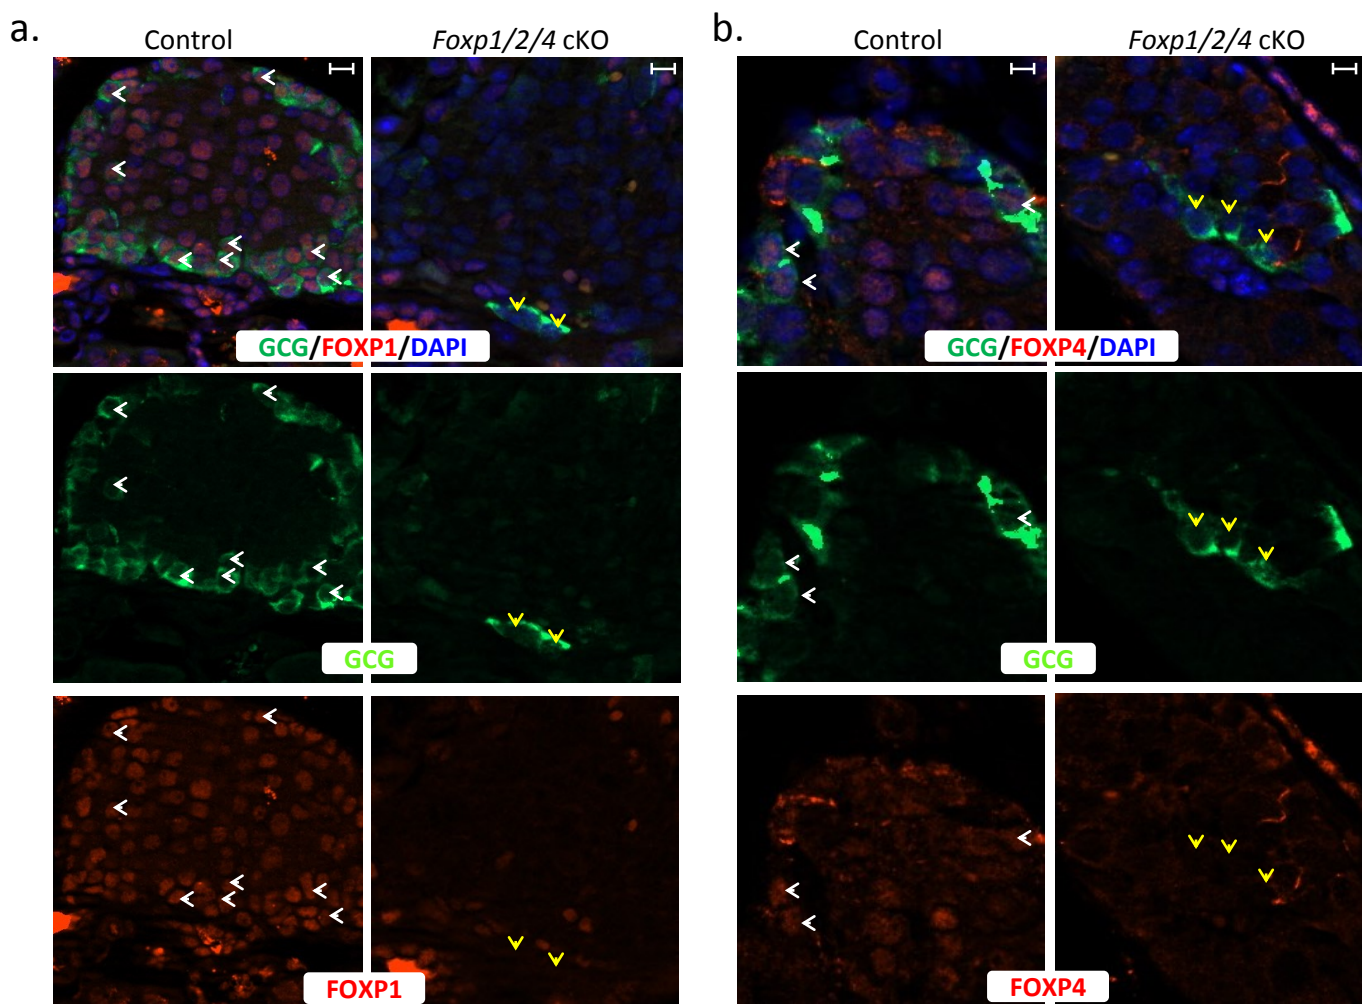

**ESM Fig. 6: FOXP1 and FOXP4 are deleted from remaining Glucagon<sup>+</sup> cells in *Foxp1/2/4* cKO mice.** Pancreata from 4W control and *Foxp1/2/4* cKO mice were monitored by immunofluorescence for Glucagon (GCG), and FOXP1 (a.) or FOXP4 (b.) White arrow head: FOXP<sup>+</sup>/Glucagon<sup>+</sup> cells; Yellow arrowhead: FOXP<sup>-</sup>/Glucagon<sup>+</sup> cells. Scale bars = 20µm.
