# Supplementary material for: The FOXP1, FOXP2 and FOXP4 transcription factors are required for islet alpha cell proliferation and function in mice
Source: Springer Nature journal article supplement (doi:10.1007/s00125-015-3635-3), 2015-05-28
Supplement: MOESM8 [file 125_2015_3635_MOESM8_ESM-1.pdf]

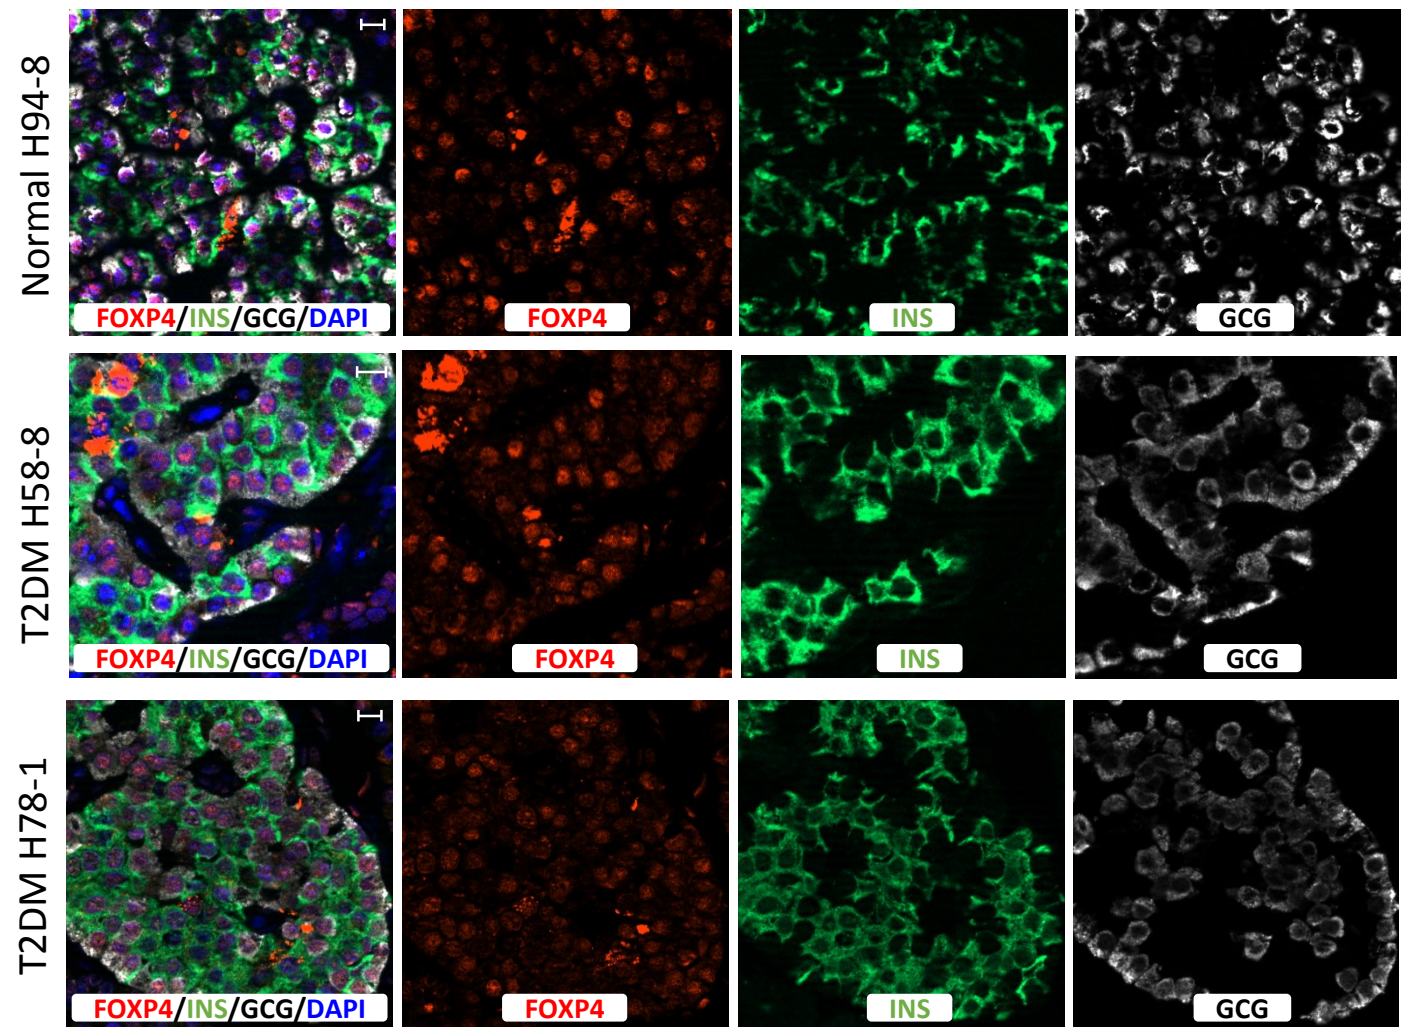

**ESM Fig. 7: FOXP4 levels appear unchanged in T2DM patients.** Pancreata from age matched normal and T2DM tissues were monitored by immunofluorescence for FOXP4, Insulin (INS) and Glucagon (GCG). Scale bars = 20 $\mu$ m.
